# Supplementary material for: Covalent organic nanosheets for effective charge transport layers in planar-type perovskite solar cells
Source: Royal Society of Chemistry journal article supplement (doi:10.1039/c7nr08797g), 2018-01-01
Supplement: c7nr08797g1.pdf [file c7nr08797g1.pdf]

Supplementary Information

**Covalent Organic Nanosheets for the Effective Charge Transport  
Layer in Planar-type Perovskite Solar Cells**

**Soyun Park<sup>a,†</sup>, Min-Sung Kim<sup>b,†</sup>, Woongsik Jang<sup>a</sup>, Jin Kuen Park<sup>\*,b</sup> and Dong  
Hwan Wang<sup>\*,a</sup>**

<sup>a</sup> School of Integrative Engineering, Chung-Ang University, 84 Heukseok-Ro, Dongjak-gu, Seoul 156-756, Republic of Korea.

<sup>b</sup>Department of Chemistry, Hankuk University of Foreign Studies, Yongin 449-791, Gyeonggi-do, Republic of Korea

\* Corresponding author, E-mail address: [jinkpark@hufs.ac.kr](mailto:jinkpark@hufs.ac.kr) (J. K. Park) and [king0401@cau.ac.kr](mailto:king0401@cau.ac.kr) (D. H. Wang)

<sup>†</sup>S. Park and M.-S. Kim contributed equally to this work.

Keywords: Covalent organic framework, Covalent organic nanosheet, Perovskite layer, Hybrid solar cell, Charge transport layer

**Table S1. Average photovoltaic parameters of PSCs fabricated with and without CON-10, respectively. (The parameters represent the standard deviation based on 7 devices per condition).**

| Average          | $V_{oc}$<br>[V] | $J_{sc}$<br>[mA/cm <sup>2</sup> ] | FF<br>[%] | PCE<br>[%] |
|------------------|-----------------|-----------------------------------|-----------|------------|
| PEDOT:PSS        | 0.97            | 15.10                             | 0.61      | 8.91       |
| PEDOT:PSS/CON-10 | 0.95            | 16.54                             | 0.64      | 10.10      |

**Table S2.  $J$ - $V$  curves of PSCs devices fabricated with CON-10 and TiO<sub>x</sub> electron transport layer.**

| Hole transport layer                   | $V_{oc}$<br>[V] | $J_{sc}$<br>[mA/cm <sup>2</sup> ] | FF<br>[%] | PCE<br>[%] |
|----------------------------------------|-----------------|-----------------------------------|-----------|------------|
| CON-10/PEDOT:PSS with TiO <sub>x</sub> | 0.98            | 14.76                             | 74        | 10.72      |

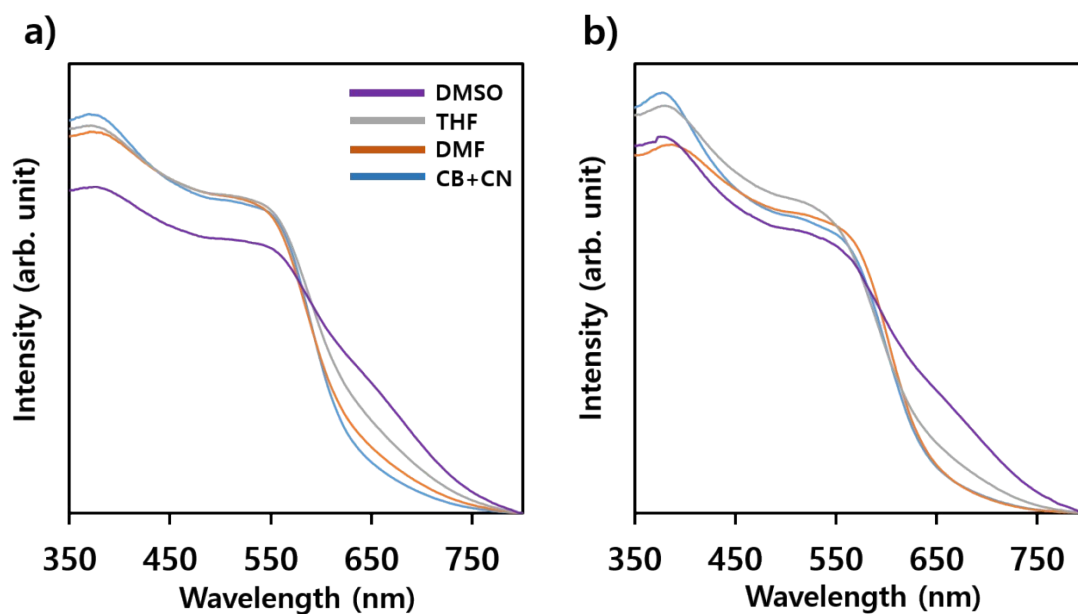

**Figure S1. The UV-Vis absorbance spectra of CON-10 (a) and CON-16 (b) in film states casted from various solvents.**

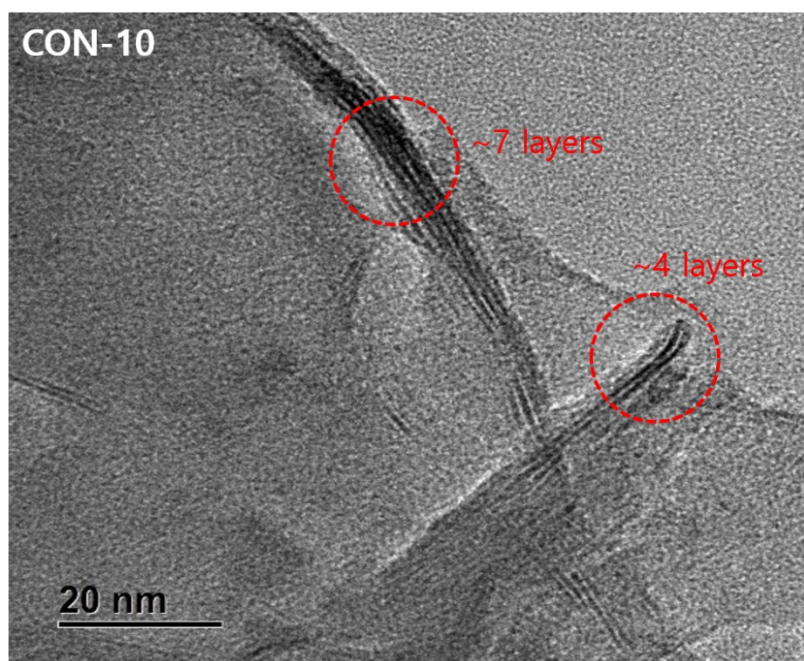

**Figure S2.** The TEM image representing the layer thickness (the circled area with red dashed line) of the primary particles of CON-10

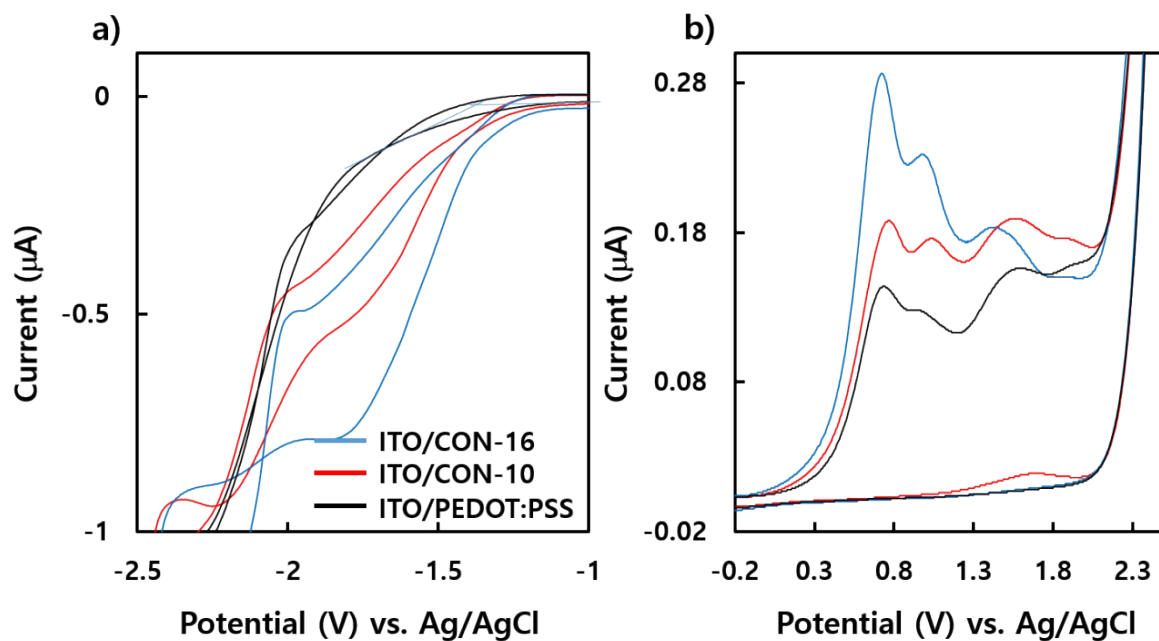

**Figure S3.** Cyclicvoltammetry profiles of CON-16 (blue), CON-10 (red) and PEDOT:PSS (black) on ITO with respect to a Ag/AgCl reference electrode in degassed anhydrous DMSO; (a) reduction potential onset region and (b) oxidation potential onset region (b).

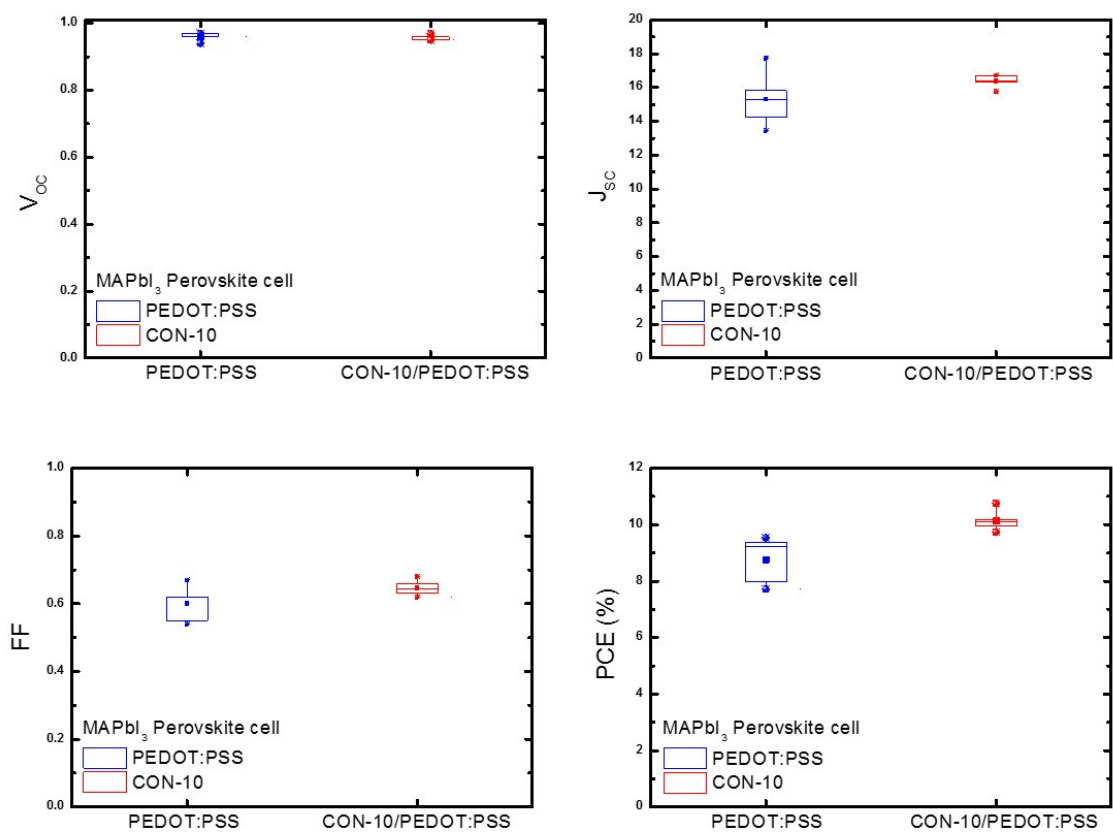

**Figure S4.** Photovoltaic parameters of PSCs fabricated with and without CON-10. (Error deviations represent the standard deviation based on 7 devices per condition).

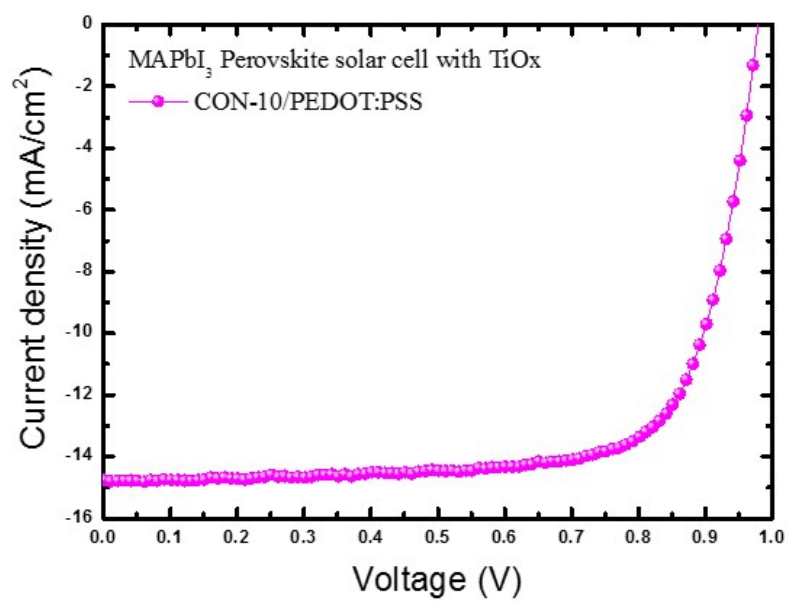

**Figure S5.**  $J$ - $V$  characteristics of PSCs fabricated with and without CON-10 and TiO<sub>x</sub> electron transport layer.
